# Supplementary material
Source: MDPI journal article supplement (https://www.mdpi.com/2674-0311/2/1/6)
Supplement: s1 [file s1]

Archive with 5 entries (5 files):
- Supplementary File S2 - Survey Questionnaire.pdf
- Supplementary materials - Table S1.pdf
- Supplementary materials - Table S3.pdf
- Supplementary materials - Table S4.pdf
- Supplementary materials - Table S5.pdf
