# Supplementary material
Source: MDPI journal article supplement (https://www.mdpi.com/2674-0311/2/1/6)
Supplement: s1 [file s1 › Supplementary materials - Table S3.pdf]

## Supplementary S3: DA Best Practice Guideline Use.

| Question                                                                                                                                                                                            | Responses                                                          | Completers    | All                  |
|-----------------------------------------------------------------------------------------------------------------------------------------------------------------------------------------------------|--------------------------------------------------------------------|---------------|----------------------|
|                                                                                                                                                                                                     |                                                                    | Only<br>N (%) | Respondents<br>N (%) |
| Have you read and accessed the DA Best Practice Guidelines for the treatment and prevention of people with overweight and obesity in adults?                                                        | Yes, I have completely accessed and completely read the guidelines | 9 (12.0)      | 27 (20.5)            |
|                                                                                                                                                                                                     | Yes, I have accessed and partially read the guidelines             | 39 (52.0)     | 57 (43.2)            |
|                                                                                                                                                                                                     | Yes, I have accessed but not read the guidelines                   | 4 (5.3)       | 5 (3.8)              |
|                                                                                                                                                                                                     | No, I have not accessed nor read the guidelines                    | 23 (30.7)     | 43 (32.6)            |
| Did you find the DA Best Practice Guidelines for the treatment and prevention of people with overweight and obesity in adults and 10-point plan useful in your practice?                            | Neither                                                            | 41 (56.2)     | 72 (56.7)            |
|                                                                                                                                                                                                     | Yes, 10-point plan only                                            | 1 (1.4)       | 4 (3.2)              |
|                                                                                                                                                                                                     | Yes, guidelines only                                               | 10 (13.7)     | 17 (13.4)            |
|                                                                                                                                                                                                     | Yes, both                                                          | 21 (28.8)     | 34 (26.8)            |
| Have you changed your practice as a result of the DA Best Practice Guidelines for the treatment and prevention of people with overweight and obesity in adults?                                     | No                                                                 | 52 (72.2)     | 97 (77.0)            |
|                                                                                                                                                                                                     | Yes                                                                | 20 (27.8)     | 29 (23.0)            |
| Was the reason your practice was not changed because your practice was aligned with the DA Best Practice Guidelines already?                                                                        | No                                                                 | 30 (58.8)     | 40 (58.8)            |
|                                                                                                                                                                                                     | Yes                                                                | 21 (41.2)     | 28 (41.2)            |
| In which areas have you made changes to your practice as a result of the DA Best Practice Guidelines for the Treatment and Prevention of people with Overweight and Obesity in Adults? <sup>a</sup> | Assessment                                                         | 16 (26.7)     | 24 (30.4)            |
|                                                                                                                                                                                                     | Management or treatment strategies                                 | 32 (53.3)     | 42 (53.2)            |
|                                                                                                                                                                                                     | Monitoring and follow-up                                           | 15 (25.0)     | 23 (29.1)            |
|                                                                                                                                                                                                     | Evaluation                                                         |               |                      |
|                                                                                                                                                                                                     | Documentation                                                      |               |                      |
|                                                                                                                                                                                                     | Other                                                              | 4 (6.7)       | 4 (5.1)              |
| Which change has made the MOST improvement to your practice?                                                                                                                                        |                                                                    | 2 (3.3)       | 5 (5.1)              |
|                                                                                                                                                                                                     |                                                                    | 18 (30.0)     | 21 (26.6)            |
|                                                                                                                                                                                                     | Assessment                                                         | 7 (12.1)      | 11 (14.3)            |
|                                                                                                                                                                                                     | Management or treatment strategies                                 | 26 (44.8)     | 31 (40.3)            |
|                                                                                                                                                                                                     | Monitoring and follow-up                                           | 6 (10.3)      | 13 (16.9)            |
|                                                                                                                                                                                                     | Evaluation                                                         |               |                      |
|                                                                                                                                                                                                     | Documentation                                                      |               |                      |
| Have you attended a DA CPD event related to the DA Best Practice Guidelines for the Treatment and                                                                                                   | Other                                                              | 2 (3.5)       | 2 (2.6)              |
|                                                                                                                                                                                                     |                                                                    | 1 (1.7)       | 1 (1.3)              |
|                                                                                                                                                                                                     |                                                                    | 16 (27.6)     | 19 (24.7)            |
|                                                                                                                                                                                                     | No                                                                 | 65 (90.3)     | 87 (90.6)            |
|                                                                                                                                                                                                     | Yes                                                                | 7 (9.7)       | 9 (9.4)              |

---

**Prevention of people with  
Overweight and Obesity in Adults?**

---

a – multiple responses allowed and therefore result may be greater than 100%. DA – Dietitians Australia; CPD – continued professional development
