# Supplementary material
Source: MDPI journal article supplement (https://www.mdpi.com/2674-0311/2/1/6)
Supplement: s1 [file s1 › Supplementary materials - Table S4.pdf]

Supplementary Table S4 – Dietary strategies and monitoring of outcomes used by respondents by year of completion

|                                                                                                                   |                                                               | 2020<br>(n=21) | 2021<br>(n=70) | Chi-Squared<br>p-value |
|-------------------------------------------------------------------------------------------------------------------|---------------------------------------------------------------|----------------|----------------|------------------------|
|                                                                                                                   |                                                               | N (%)          | N (%)          |                        |
| <b>Services dietary approach</b> <sup>(a), (b)</sup>                                                              | General healthy eating                                        | 15 (71)        | 53 (76)        | 0.69                   |
|                                                                                                                   | Set energy level plan                                         | 7 (33)         | 18 (26)        | 0.49                   |
|                                                                                                                   | Formulated meal plan                                          | 6 (29)         | 11 (16)        | 0.19                   |
|                                                                                                                   | General advice on low fat eating                              | 3 (14)         | 15 (21)        | 0.47                   |
|                                                                                                                   | Specific low fat eating plan                                  | 0 (0)          | 2 (3)          | 0.43                   |
|                                                                                                                   | Non-diet approach with specific focus to reduce energy intake | 12 (57)        | 37 (53)        | 0.73                   |
|                                                                                                                   | Non-diet approach eating behaviour goals                      | 13 (62)        | 42 (60)        | 0.88                   |
|                                                                                                                   | Very low energy diet                                          | 11 (52)        | 27 (39)        | 0.26                   |
|                                                                                                                   | <b>Meal replacements</b>                                      | <b>9 (43)</b>  | <b>11 (16)</b> | <b>0.01</b>            |
|                                                                                                                   | Health at Every Size                                          | 7 (33)         | 29 (41)        | 0.51                   |
|                                                                                                                   | Other                                                         | 0 (0)          | 7 (10)         | 0.13                   |
| <b>How specific dietary strategies or interventions selected for clients</b> <sup>(a), (b)</sup>                  | Client preference                                             | 17 (81)        | 51 (73)        | 0.45                   |
|                                                                                                                   | Client past dieting experience                                | 10 (48)        | 41 (59)        | 0.38                   |
|                                                                                                                   | Dietitian practitioner experience                             | 10 (48)        | 29 (41)        | 0.62                   |
|                                                                                                                   | Based on program/service philosophy                           | 2 (10)         | 9 (13)         | 0.68                   |
|                                                                                                                   | As requested by medical referral                              | 5 (24)         | 12 (17)        | 0.49                   |
|                                                                                                                   | Method negotiated by practitioner with client                 | 16 (76)        | 45 (64)        | 0.31                   |
|                                                                                                                   | Other                                                         | 0 (0)          | 4 (6)          | 0.26                   |
| <b>Client outcome measures used to monitor progress (up to 6 months follow up) of clients</b> <sup>(a), (b)</sup> | Weight/BMI                                                    | 4 (19)         | 20 (29)        | 1.00                   |
|                                                                                                                   | Waist circumference                                           | 2 (10)         | 9 (13)         | 0.87                   |
|                                                                                                                   | Waist to hip ratio                                            | 0 (0)          | 5 (7)          | 0.27                   |
|                                                                                                                   | Metabolic indicators                                          | 3 (14)         | 15 (21)        | 1.00                   |
|                                                                                                                   | Diet improvements                                             | 3 (14)         | 22 (31)        | 0.13                   |
|                                                                                                                   | Exercise levels                                               | 2 (10)         | 12 (17)        | 0.74                   |
|                                                                                                                   | Quality of life                                               | 3 (14)         | 18 (26)        | 0.59                   |
|                                                                                                                   | CBT related changes                                           | 0 (0)          | 4 (6)          | 0.34                   |
|                                                                                                                   | Achievement of goals                                          | 1 (5)          | 12 (17)        | 0.25                   |
|                                                                                                                   | Clothing size                                                 | 1 (5)          | 10 (14)        | 0.40                   |
|                                                                                                                   | Blood pressure                                                | 1 (5)          | 7 (10)         | 0.71                   |
|                                                                                                                   | Fitness level, aerobic capacity, muscle mass, VO2max          | 0 (0)          | 2 (3)          | 0.51                   |
|                                                                                                                   | Patient attendance                                            | 2 (10)         | 12 (17)        | 0.74                   |
|                                                                                                                   | Patient satisfaction                                          | 4 (19)         | 18 (26)        | 0.71                   |
|                                                                                                                   | Medication                                                    | 1 (5)          | 4 (6)          | 0.83                   |
|                                                                                                                   | Psychological/ body image changes                             | 1 (5)          | 9 (13)         | 0.49                   |
|                                                                                                                   | Other                                                         | 1 (5)          | 2 (3)          | 0.41                   |

(a) - multiple responses allowed and therefore result may be greater than 100%; (b) – responses scored as a yes or no.
