# Supplementary material
Source: MDPI journal article supplement (https://www.mdpi.com/2674-0311/2/1/6)
Supplement: s1 [file s1 › Supplementary materials - Table S5.pdf]

Supplementary Table S5 – ANOVA's comparing Best Practice vs Enablers, Barriers and Gaps in Practice.

|                                                                                | Mean (SD) best<br>practice score if<br>answered "Yes" | Mean (SD) best<br>practice score if<br>answered "No" | Difference (95%<br>CI)          | F statistic<br>(df 1, 61) | p-value     |
|--------------------------------------------------------------------------------|-------------------------------------------------------|------------------------------------------------------|---------------------------------|---------------------------|-------------|
| <b>Barriers</b>                                                                |                                                       |                                                      |                                 |                           |             |
| Time (relative to<br>workload)                                                 | 37.09 (8.35)                                          | 38.39 (6.84)                                         | -1.29<br>(-5.15, 2.56)          | 0.45                      | 0.50        |
| Resources (e.g. referral<br>system, facilities, tools)                         | 34.36 (5.62)                                          | 38.69 (7.87)                                         | -4.34<br>(-8.85, 0.18)          | 3.69                      | 0.06        |
| Lack of staff (either<br>dietitian or<br>multidisciplinary)                    | 37.73 (6.24)                                          | 37.68 (8.09)                                         | 0.19<br>(-4.25, 4.64)           | 0.01                      | 0.93        |
| Management related (e.g.<br>not a priority of the<br>service)                  | 36.21 (6.33)                                          | 38.16 (7.95)                                         | -1.95<br>(-6.57, 2.67)          | 0.71                      | 0.40        |
| <b>Characteristics of the<br/>population group</b>                             | <b>34.91 (6.26)</b>                                   | <b>39.24 (7.91)</b>                                  | <b>-4.33<br/>(-8.24, -0.43)</b> | <b>4.94</b>               | <b>0.03</b> |
| Lack of knowledge with<br>regard to best practice<br>management                | 33.14 (9.79)                                          | 38.30 (7.20)                                         | -5.16<br>(-11.17, 0.85)         | 2.95                      | 0.09        |
| Referrer related issues                                                        | 36.50 (10.27)                                         | 38.02 (6.94)                                         | -1.52<br>(-6.43, 3.39)          | 0.38                      | 0.54        |
| Lack of skills either<br>psychological,<br>counselling or physical<br>activity | 35.08 (6.18)                                          | 38.42 (7.85)                                         | -3.34<br>(-8.04, 1.36)          | 2.02                      | 0.16        |
| No evidence of treatment<br>effectiveness                                      | 37.44 (8.96)                                          | 37.78 (7.46)                                         | -0.33<br>(-5.86, 5.19)          | 0.01                      | 0.90        |
| <b>There are no barriers</b>                                                   | <b>43.09 (4.70)</b>                                   | <b>36.60 (7.65)</b>                                  | <b>6.49<br/>(1.68, 11.31)</b>   | <b>7.28</b>               | <b>0.01</b> |
| <b>Enablers</b>                                                                |                                                       |                                                      |                                 |                           |             |
| Resources                                                                      | 37.74 (7.39)                                          | 37.59 (8.24)                                         | 0.16<br>(-4.15, 4.46)           | 0.01                      | 0.94        |
| <b>Access to a<br/>multidisciplinary team</b>                                  | <b>38.98 (7.19)</b>                                   | <b>34.90 (7.75)</b>                                  | <b>4.08<br/>(0.10, 8.05)</b>    | <b>4.21</b>               | <b>0.04</b> |
| Supportive referrers/<br>medical staff                                         | 39.00 (5.85)                                          | 36.23 (8.99)                                         | 2.76<br>(-0.98, 6.51)           | 2.18                      | 0.15        |
| <b>CPD activities<br/>done/personal level of<br/>experience</b>                | <b>39.20 (6.83)</b>                                   | <b>34.40 (8.19)</b>                                  | <b>4.80<br/>(0.88, 8.72)</b>    | <b>6.00</b>               | <b>0.02</b> |
| Physical environment                                                           | 39.69 (6.01)                                          | 37.04 (7.95)                                         | 2.65<br>(-1.70, 6.99)           | 1.48                      | 0.23        |
| Length of time available<br>for sessions                                       | 37.77 (7.52)                                          | 37.50 (7.90)                                         | 0.27<br>(-4.12, 4.66)           | 0.02                      | 0.90        |
| Referral system/<br>mechanism/ access                                          | 38.38 (6.07)                                          | 37.30 (8.37)                                         | 1.08<br>(-2.85, 5.00)           | 0.30                      | 0.59        |

|                                                                                                           |                     |                     |                                  |             |             |
|-----------------------------------------------------------------------------------------------------------|---------------------|---------------------|----------------------------------|-------------|-------------|
| Patient characteristics or support                                                                        | 39.73 (6.00)        | 36.32 (8.25)        | 3.41<br>(-0.36, 7.19)            | 3.27        | 0.08        |
| Access to data for patient management                                                                     | 37.35 (6.25)        | 38.19 (9.15)        | -0.83<br>(-4.68, 3.01)           | 0.19        | 0.67        |
| <i>Gaps in skills</i>                                                                                     |                     |                     |                                  |             |             |
| Behavioural therapy/ modification or motivation or stages of change                                       | 37.27 (8.05)        | 37.96 (6.66)        | -0.69<br>(-4.59, 3.21)           | 0.13        | 0.72        |
| Knowledge of best practice guidelines, follow-up, dealing with specific populations                       | 34.78 (6.91)        | 38.68 (7.47)        | -3.90<br>(-8.00, 0.19)           | 3.64        | 0.06        |
| Resource related e.g. time, computer, facilities                                                          | 37.64 (7.50)        | 37.53 (7.54)        | 0.11<br>(-4.90, 5.12)            | 0.00        | 0.97        |
| Physical activity related                                                                                 | 35.00 (5.38)        | 38.16 (7.81)        | -3.16<br>(-7.93, 1.61)           | 1.75        | 0.19        |
| <b>Client assessment prior to and during therapy, including anthropometric assessment or goal setting</b> | <b>31.25 (9.30)</b> | <b>38.48 (6.78)</b> | <b>-7.23<br/>(-12.62, -1.84)</b> | <b>7.19</b> | <b>0.01</b> |
| Personal interest (lack of)                                                                               | 34.78 (6.04)        | 38.02 (7.63)        | -3.24<br>(-8.61, 2.13)           | 1.46        | 0.23        |
| <b>No perceived gaps</b>                                                                                  | <b>43.29 (6.10)</b> | <b>36.82 (7.35)</b> | <b>6.47<br/>(0.66, 12.28)</b>    | <b>4.96</b> | <b>0.03</b> |
